# Supplementary material for: Adverse renal effects of NLRP3 inflammasome inhibition by MCC950 in an interventional model of diabetic kidney disease
Source: Oxford University Press journal article supplement (doi:10.1042/cs20210865), 2022-01-01

**Supplemental table 1.** Mouse probe and primer sequences for qRT-PCR

| Genes                          | Probe Sequence (5'FAM-3" TAMRA) | Forward Primer 5'-3'          | Reverse Primer 5'-3'         |
|--------------------------------|---------------------------------|-------------------------------|------------------------------|
| <i>Nox2</i>                    | CAACTGGACAGGAACCT               | AGTGCGTGTGCTCGACAAG           | CCAAGCTACCATCTTATGGAAAGT     |
| <i>Nox4</i>                    | CATTTTGCTATTTTCATCAAA           | AAAAATATCACACACTGAATTCGAGACT  | TGGGTCCACAGCAGAAAAGTC        |
| <i>MCP-1</i>                   | AATGGGTCCAGACATAC               | GTCTGTGCTGACCCCAAGAAG         | TGGTTCGATCCAGGTTTTTA         |
| <i>Collagen I</i>              | ATCGACCCTAACCAAG                | GACTGGAAGAGCGGAGAGTACTG       | CCTTGATGGCGTCCAGGTT          |
| <i>Collagen IV</i>             | CAGTGCCCTAACGGT                 | GGCGGTACACAGTCAGACCAT         | GGAATAGCCGATCCACAGTGA        |
| <i>Fibronectin</i>             | CCCCGTCAGGCTTA                  | ACATGGCTTTAGGCGGACAA          | ACATTCGGCAGGTATGGTCTTG       |
| <i><math>\alpha</math>-SMA</i> | TGCCAGATCTTTTCC                 | GACGCTGAAGTATCCGATAGAACA      | GGCCACACGAAGCTCGTTAT         |
| <i>Il1<math>\beta</math></i>   | CTGAAAGCTCTCCACCTC              | TCGTGCTGTCGGACCCATA           | CTTGTACAAAGCTCATGGAGAATATCAC |
| <i>Il18</i>                    | SYBER                           | CACATGCGCCTTGTGATGAC          | TGCAGCCTCGGGTATTCTGT         |
| <i>Tgf <math>\beta</math>1</i> | AAAGCCCTGTATTCCGT               | GCAGTGGCTGAACCAAGGA           | GCAGTGAGCGCTGAATCGA          |
| <i>Ctgf</i>                    | ACTGCCTGGTCCAGAC                | GCTGCCTACCGACTGGAAGA          | CTTAGAACAGGCGCTCCACTCT       |
| <i>Pcna</i>                    | CACAGCTGTACTCCTGTTC             | TCAAGAGAAAGTTTCAGACTATGAAATGA | AAATTCACCAGATGGCATCTTTATT    |
| <i>P21</i>                     | AGAGCCACAGGCACC                 | TCCACAGCGATATCCAGACATT        | CGGACATCACCAGGATTGG          |

**Supplemental table 2:** Human probes and primers for RT-PCR

| Genes                        | Probe Sequence (6-FAM 5'-3') | Forward Primer 5'-3'   | Reverse Primer 5'-3'     |
|------------------------------|------------------------------|------------------------|--------------------------|
| <i>NOX2</i>                  | CCTCCTGCCATGACT              | AGAGGGTTGGAGGTGGAGAATT | GCACAAGGAGCAGGACTAGATGA  |
| <i>NOX4</i>                  | TCCATTTGCATCAATACT           | GGCTGGAGGCATTGGAGTAA   | CCAGTCATCCAACAGGGTGTT    |
| <i>MCP-1</i>                 | CAGGAAACCAATATCCA            | CAAAGCAGGGCTCGAGTTG    | CCTGGGACTAGACTTGATGTCTCA |
| <i>TLR-4</i>                 | ATCCATGAAGGTTTCC             | GGCCATTGCTGCCAACAT     | CAACAATCACCTTTCGGCTTTT   |
| <i>NLRP3</i>                 | CTGCGGACTGTCCCAT             | GACCATCGGCCGGACTAAA    | CGTCCTCGGGCTCAAACA       |
| <i>IL1<math>\beta</math></i> | SYBER                        | TTGGTGATGTGGTCCATATGA  | TACAAAGGACATGGAGAACACCAC |
| <i>IL18</i>                  | CAGGAAATACGAAATGGA           | TGTGTGATCGCCACAAACCT   | CACTGCCCCGTATCTCAGAAA    |

Uncropped (original) gel used for western blot in figure. 2

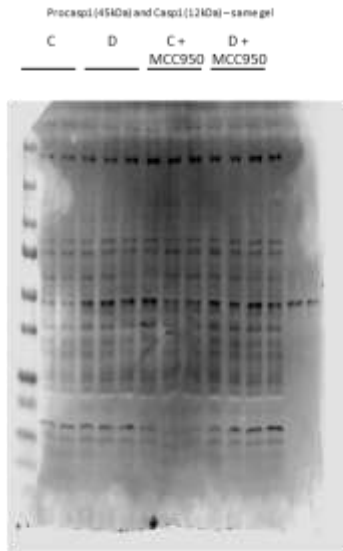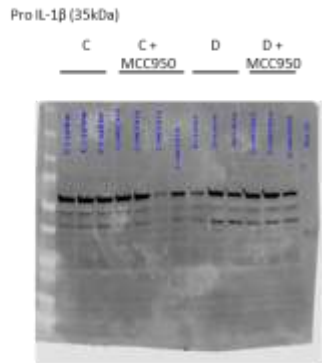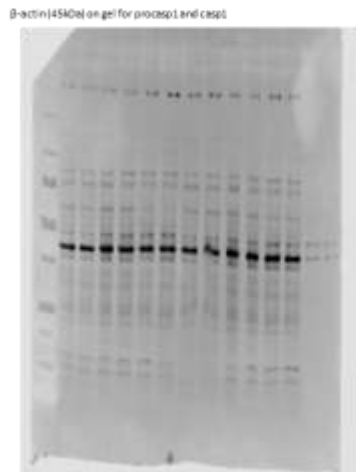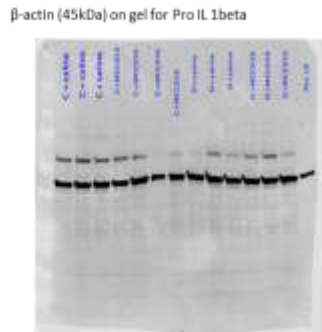

Supplement: cs-2021-0865_supp.pdf [file cs-2021-0865_supp.pdf]
